# Supplementary material for: More targets, more pathways and more clues for mutant p53
Source: PubMed Central journal article supplement — Oncogenesis. 2013 Jul 1;2(7):e54–. doi: 10.1038/oncsis.2013.15 (PMC3740285; doi:10.1038/oncsis.2013.15), 2013-07-01
Supplement: oncsis201315x1.pdf [file oncsis201315x1.pdf]

tepper et al THE PROSTATE 2005

|               | G245S          | R248W          | R273H          | P151S           | G245S       | R248W | R273H | P151S |
|---------------|----------------|----------------|----------------|-----------------|-------------|-------|-------|-------|
| ADCY1         | + AB026190     | + AB026190     | + ABCB10       | + ABCB10        | + 13CDNA73  | -     | -     | -     |
| ADH5          | + ACSL3        | + ACSL3        | + ABCC4        | + ABCC4         | + ACPF      | -     | -     | -     |
| ADPRTL2       | + ACTA2        | + ADCY1        | + ACSL3        | + ACSL3         | + ACSL4     | -     | -     | -     |
| ALDH1A3       | + ADH5         | + ADPRTL2      | + ACTA2        | + ACTA2         | + ADD3      | -     | -     | -     |
| ALDH2         | + ADPRTL2      | + ALDH1A3      | + ACTG2        | + ACTG2         | + ADRB2     | -     | -     | -     |
| AR            | + AK3          | + ALDH2        | + ACTR3        | + AF1Q          | + AGR2      | -     | -     | -     |
| ARN2          | + ALDH2        | + ANPT2        | + ADAM7        | + AGR2          | + AHR       | -     | -     | -     |
| AUTS2         | + ANP32E       | + APOBEC3G     | + ADAM9        | + AHR           | + ALCAM     | -     | -     | -     |
| BAG2          | + APG-1        | + AR           | + ADRB2        | + ARG1          | + ATP2B1    | -     | -     | -     |
| BARD1         | + APG12L       | + ARHGAP19     | + AGR2         | + BAX           | + B2M       | -     | -     | -     |
| BBX           | + AR           | + ARNT2        | + AIM1         | + BCHE          | + BAX       | -     | -     | -     |
| BCKDHB        | + ARNT2        | + AUTS2        | + AKR1C1       | + C6orf32       | + BCHE      | -     | -     | -     |
| BCL6          | + ATR          | + BAG1         | + ALDH1A3      | + CA12          | + C6orf32   | -     | -     | -     |
| BDH           | + AUIS32       | + BAG2         | + ANGPT2       | + CCM1          | + CD99      | -     | -     | -     |
| BET1          | + BAG2         | + BARD1        | + ANP32E       | + CELSR1        | + CLN5      | -     | -     | -     |
| BTG3          | + BARO1        | + BMP2K        | + APOBEC3G     | + COBL          | + COBL      | -     | -     | -     |
| BTN3A3        | + BCAS2        | + BTG3         | + ARF6         | + CPN2          | + COL16A1   | -     | -     | -     |
| C13orf1       | + BCKDHB       | + C13orf1      | + ARGBP2       | + CTSS          | + CPN2      | -     | -     | -     |
| C4orf15       | + BCL6         | + CASK         | + AZGP1        | + CYP3A7        | + CYP3A7    | -     | -     | -     |
| CASK          | + BDH          | + CDC2         | + BCAP29       | + DBCCR1L       | + CYP3A7    | -     | -     | -     |
| CCL5          | + BET1         | + CDC6         | + BICD2        | + DDC           | + DBCCR1L   | -     | -     | -     |
| CCT8          | + BRD2         | + CDK8         | + BMPR1A       | + DDX3Y         | + DDC       | -     | -     | -     |
| CDC6          | + BRDT         | + CDS1         | + BRCA2        | + DKFZP586A0522 | + DDI3      | -     | -     | -     |
| CDK8          | + BTG3         | + CIP29        | + BRD2         | + DKFZP586M1120 | + DDX3Y     | -     | -     | -     |
| CDS1          | + BTN3A3       | + CKS1B        | + BTG1         | + EFS           | + EFS       | -     | -     | -     |
| CIP29         | + C13orf1      | + CREB1        | + EUB1         | + ESD           | + EIF1AY    | -     | -     | -     |
| CKS1B         | + C4orf15      | + CRISP2       | + EUB1B        | + ETV1          | + ERG       | -     | -     | -     |
| CLPX          | + CAP350       | + CTPS         | + C13orf1      | + FN1           | + ESD       | -     | -     | -     |
| CMKOR1        | + COT2         | + CUL5         | + C14orf120    | + G6PC          | + ETV1      | -     | -     | -     |
| CREB1         | + CDC8         | + CYB561       | + C6orf32      | + GABARAPL1     | + FCGR2A    | -     | -     | -     |
| CTH           | + CDC6         | + DAAM1        | + CA12         | + GAGEB1        | + FLJ13236  | -     | -     | -     |
| CTPS          | + CDS1         | + DAP3         | + CALU         | + GOLC          | + FN1       | -     | -     | -     |
| CUL5          | + CEACAM3      | + DHRS3        | + CAPN2        | + GLRA3         | + FOLH1     | -     | -     | -     |
| DAAM1         | + CFPD1        | + DICER1       | + CCDG6        | + GPR126        | + FOS       | -     | -     | -     |
| DDHD2         | + CIP29        | + DIO1         | + CCNA2        | + GSTA1         | + FPR1      | -     | -     | -     |
| DDIT4         | + CKS1B        | + DKFZP434C212 | + CCNB1        | + GULP1         | + G6PC      | -     | -     | -     |
| DDX21         | + CLPX         | + DMXL1        | + CCNB2        | + H1FO          | + GAGEB1    | -     | -     | -     |
| DHRS3         | + OCL4A5       | + EZF3         | + CCH2         | + HIST1H2AE     | + GOLC      | -     | -     | -     |
| DICER1        | + CREB1        | + FZR          | + CD2          | + HIST1H2BN     | + GDF15     | -     | -     | -     |
| DIO1          | + CTPS         | + FADS1        | + CDC42EP3     | + IL24          | + GNAI1     | -     | -     | -     |
| DKFZP434C212  | + CUL5         | + FALZ         | + CD6          | + IRS1          | + GPR126    | -     | -     | -     |
| DKFZP564M1462 | + CXCL11       | + FAM3C        | + CDKN3        | + KCNK1         | + GULP1     | -     | -     | -     |
| DLEU2         | + CYB561       | + FDF1         | + CEBPD        | + KIAA0367      | + H1FO      | -     | -     | -     |
| DMXL1         | + D8S2298E     | + FECH         | + CKS1B        | + KLK3          | + HIST1H2AE | -     | -     | -     |
| DSFG3         | + DAAM1        | + FLJ14431     | + CKS2         | + LOC123876     | + HIST2H4   | -     | -     | -     |
| DSTN          | + DDHD2        | + FLJ14639     | + CLGN         | + LUM           | + IL24      | -     | -     | -     |
| E2F3          | + DDX21        | + FLJ34588     | + CLU          | + MAGEA1        | + IRS1      | -     | -     | -     |
| EIF2S3        | + DICER1       | + FNBP3        | + CREB1        | + MAGEA4        | + KCNK1     | -     | -     | -     |
| EIF4E         | + DKFZP434C212 | + GAGE3        | + CRISP2       | + MAGEA5        | + KIAA0408  | -     | -     | -     |
| ELVOL6        | + DLEU2        | + GLI2         | + CRISP3       | + MCCO2         | + KIAA0767  | -     | -     | -     |
| ELYS          | + DMXL1        | + GNAH1        | + CROT         | + MCC39325      | + KIAA0789  | -     | -     | -     |
| EPHX1         | + E2F3         | + GNB2L1       | + CTPS         | + MME           | + KIAA0861  | -     | -     | -     |
| F2R           | + EHHADH       | + GOSR1        | + DBI          | + MT1G          | + KLK3      | -     | -     | -     |
| FADS1         | + EIF1AX       | + GPNMB        | + DHFR         | + MYCBP2        | + LCP1      | -     | -     | -     |
| FALZ          | + EIF2S3       | + GTF3A        | + DICER1       | + NEFL          | + LOC123876 | -     | -     | -     |
| FAM3C         | + EIF4G1       | + H2AFX        | + DKFZP564B167 | + NFKB2         | + LOC90925  | -     | -     | -     |
| FAT           | + ELYS         | + HIBCH        | + DLG2         | + OVGPI         | + LUM       | -     | -     | -     |
| FDF1          | + ETFDH        | + HIST1H4C     | + DLG7         | + PF4V1         | + MAGEA1    | -     | -     | -     |
| FECH          | + F2R          | + HMGB2        | + DPP4         | + PHLD2A        | + MAGEA4    | -     | -     | -     |
| FLJ14431      | + F2RL1        | + HMMR         | + DR1          | + PLA2G2A       | + MAGEA5    | -     | -     | -     |
| FLJ14639      | + FADS1        | + HOMER1       | + DSG2         | + POFUT1        | + MAOA      | -     | -     | -     |
| FLJ34588      | + FALZ         | + HSPCB        | + DUSP4        | + PRKR          | + MME       | -     | -     | -     |
| FMO5          | + FAT          | + ID1          | + EIF4AX       | + RAB1A         | + MT1G      | -     | -     | -     |
| FNBP3         | + FDF1         | + IGKC         | + ELK4         | + RPL23AP7      | + MYCBP2    | -     | -     | -     |
| FNBP4         | + FECH         | + IL7          | + ELL2         | + RPS4Y1        | + NEFL      | -     | -     | -     |
| GAGE3         | + FLJ14431     | + INADL        | + ELOVL5       | + RTN1          | + NFKB2     | -     | -     | -     |
| GCLM          | + FLJ14639     | + KNDJ3        | + ETV1         | + SEMA3C        | + PF4V1     | -     | -     | -     |
| GLI2          | + FLJ34588     | + KHDRBS3      | + F2RL1        | + SI            | + PLA2G2A   | -     | -     | -     |
| GNAI1         | + FMO5         | + KIAA0186     | + FADS1        | + SLC39A8       | + PMP2      | -     | -     | -     |
| GNB2L1        | + FNBP3        | + KIAA0888     | + FKBP5        | + SLC4A4        | + POLR2K    | -     | -     | -     |
| GOSR1         | + FUSIP1       | + KIAA0924     | + FLJ10569     | + SMARCCD3      | + PRKR      | -     | -     | -     |
| GP2D          | + GAGE3        | + KIF2C        | + FLJ13305     | + SSX2          | + RAB1A     | -     | -     | -     |
| GPNMB         | + GAL          | + KNTC2        | + FLJ36754     | + SSX3          | + RPLP1     | -     | -     | -     |
| GT3A          | + GCLM         | + KPN2A        | + FN1          | + TPPI          | + RPS4Y1    | -     | -     | -     |
| GUCY1A3       | + GSH          | + KPNB3        | + FNBP3        | + THBS2         | + SDFR1     | -     | -     | -     |
| GUCY1B3       | + GLI2         | + KRAS2        | + GBP1         | + TJP2          | + SEMA3C    | -     | -     | -     |

|           | G245S | R248W     | R273H | P151S     | G245S | R248W     | R273H | P151S |
|-----------|-------|-----------|-------|-----------|-------|-----------|-------|-------|
| HCG4      | +     | GNB2L1    | +     | LARP      | +     | GLI2      | +     | TNP2  |
| HERC4     | +     | GOSR1     | +     | LIM       | +     | GLRX      | +     | TSPY1 |
| HIBC1     | +     | GOT2      | +     | LOC200895 | +     | GLUD1     | +     | WNT5A |
| HIST1H4C  | +     | GP2       | +     | LOC81691  | +     | GNAH1     | +     | ZBTB1 |
| HMG2      | +     | GPMB      | +     | LPP       | +     | GPR105    | +     |       |
| HOMER1    | +     | GST44     | +     | LRRFIP1   | +     | GSR       | +     |       |
| HRSLS3    | +     | GTF3A     | +     | MAD2L1    | +     | GTF3A     | +     |       |
| HSPCB     | +     | GUCY1A3   | +     | ME1       | +     | GUCY1A3   | +     |       |
| HSRTSBETA | +     | HCG4      | +     | MELK      | +     | H2AFX     | +     |       |
| HSU79274  | +     | HIBCH     | +     | MEOX2     | +     | H41       | +     |       |
| ICK       | +     | HIST1H4C  | +     | MEST      | +     | HERC3     | +     |       |
| ID1       | +     | HMG2      | +     | MID1      | +     | HIST1H4C  | +     |       |
| IL7       | +     | HOMER1    | +     | MIZ1      | +     | HMG2      | +     |       |
| INADL     | +     | H-pik     | +     | MRC3      | +     | HMMR      | +     |       |
| INSIG2    | +     | HSP90     | +     | MRP56     | +     | HOMER2    | +     |       |
| KHDRBS3   | +     | HSU15552  | +     | MTAP      | +     | HPGD      | +     |       |
| KIAA0186  | +     | HSU79274  | +     | NKTR      | +     | ID1       | +     |       |
| KIAA0669  | +     | ICK       | +     | NMI       | +     | ID2       | +     |       |
| KIAA0888  | +     | ID1       | +     | NPD014    | +     | ID3       | +     |       |
| KIAA0924  | +     | INADL     | +     | NOO1      | +     | IGF1R     | +     |       |
| KIF2C     | +     | KATNA1    | +     | NR3C1     | +     | IGFBP2    | +     |       |
| KNTC2     | +     | KIAA0179  | +     | NUP153    | +     | IGFBP3    | +     |       |
| KPNA2     | +     | KIAA0186  | +     | PAQR3     | +     | IQGAP2    | +     |       |
| KPNB3     | +     | KIAA0669  | +     | PCNA      | +     | KATNA1    | +     |       |
| KRAS2     | +     | KIAA0711  | +     | PEG10     | +     | KIAA0101  | +     |       |
| LAMA3     | +     | KIAA0794  | +     | PGM1      | +     | KIAA0186  | +     |       |
| LARP      | +     | KIAA0888  | +     | PHK8      | +     | KIAA0924  | +     |       |
| LIM       | +     | KIAA0924  | +     | PIK3CA    | +     | KIAA0953  | +     |       |
| LMO4      | +     | KIAA0971  | +     | PLA2G4A   | +     | KIAA1102  | +     |       |
| LOC120526 | +     | KIF2C     | +     | PPBP      | +     | KIF2C     | +     |       |
| LOC171220 | +     | KIF3A     | +     | PRKCJ     | +     | KLK2      | +     |       |
| LOC200895 | +     | KNTC2     | +     | PTTG1     | +     | KLK3      | +     |       |
| LOC54103  | +     | KPNA2     | +     | PVRL3     | +     | KNTC2     | +     |       |
| LOC81691  | +     | KRAS2     | +     | PYGL      | +     | KPNA2     | +     |       |
| LOC90355  | +     | LARP      | +     | RAD51C    | +     | KRT19     | +     |       |
| LONP      | +     | LMO4      | +     | RAD51L3   | +     | LAMC1     | +     |       |
| LPP       | +     | LOC200895 | +     | RBBP6     | +     | LDHA      | +     |       |
| LRRFIP1   | +     | LOC81691  | +     | RBBP8     | +     | LILRB1    | +     |       |
| MAD2L1    | +     | LPP       | +     | RFC3      | +     | LIM       | +     |       |
| MAD4      | +     | LPXN      | +     | RLN1      | +     | LOC120526 | +     |       |
| MDK       | +     | LRP8      | +     | RLN2      | +     | LOC200895 | +     |       |
| ME1       | +     | LRRFIP1   | +     | RNF6      | +     | LOC221810 | +     |       |
| MELK      | +     | MAD2L1    | +     | RPS8KA3   | +     | LOC81691  | +     |       |
| MEOX2     | +     | MAP4      | +     | RRM1      | +     | LRP8      | +     |       |
| MEST      | +     | MARCKS    | +     | SEC3L1    | +     | LSM6      | +     |       |
| MID1      | +     | MDK       | +     | SF1       | +     | MAD2L1    | +     |       |
| MIZ1      | +     | ME1       | +     | SFRS2     | +     | MAF       | +     |       |
| MRC3      | +     | MELK      | +     | SLAC2-B   | +     | MALT1     | +     |       |
| MRPS6     | +     | MEST      | +     | SLC16A4   | +     | MAP2      | +     |       |
| MTAP      | +     | MIZ1      | +     | SLC26A2   | +     | MAP2K5    | +     |       |
| NFAT5     | +     | MRC3      | +     | SLCA7     | +     | MAP3K5    | +     |       |
| NKTR      | +     | MRE11A    | +     | SMA4      | +     | MAP7      | +     |       |
| NMI       | +     | MRPS6     | +     | SMC4L1    | +     | MAPK6     | +     |       |
| NPC1      | +     | MTAP      | +     | SNTB2     | +     | MARCKS    | +     |       |
| NPD014    | +     | MTERF     | +     | SPAG5     | +     | MAZ       | +     |       |
| NOO1      | +     | NBEA      | +     | SOSTM1    | +     | MEIS1     | +     |       |
| NUP153    | +     | NFAT5     | +     | SS18      | +     | MELK      | +     |       |
| PAICS     | +     | NKTR      | +     | SSA2      | +     | MGC34648  | +     |       |
| PAQR3     | +     | NMI       | +     | ST18      | +     | MTAP      | +     |       |
| PGM1      | +     | NPC1      | +     | STAT3     | +     | MYBL2     | +     |       |
| PHACTR4   | +     | NPD014    | +     | STATH     | +     | NBEA      | +     |       |
| PHK8      | +     | NPTX2     | +     | TAF1A     | +     | NDN       | +     |       |
| PIK3CA    | +     | NUP153    | +     | TEB4      | +     | NDRG1     | +     |       |
| PORIMIN   | +     | NUP155    | +     | THRAP1    | +     | NFKBIA    | +     |       |
| PRKCI     | +     | PACRG     | +     | TK1       | +     | NKTR      | +     |       |
| PRMT3     | +     | PAICS     | +     | TMSNB     | +     | NKX3-1    | +     |       |
| PVRL3     | +     | PAK3      | +     | TOP2A     | +     | NMI       | +     |       |
| PYGL      | +     | PAQR3     | +     | TPX2      | +     | NMU       | +     |       |
| RAD51C    | +     | PGM1      | +     | TRIM2     | +     | NPC1      | +     |       |
| RAPGEF2   | +     | PHK8      | +     | TUBB      | +     | NPD014    | +     |       |
| RB1CC1    | +     | PIK3CA    | +     | TUSC3     | +     | NUP153    | +     |       |
| RBBP6     | +     | PLA2G4A   | +     | TXNL4     | +     | NUP155    | +     |       |
| RBBP8     | +     | PLK2      | +     | TYMS      | +     | OSBP8     | +     |       |
| RCN1      | +     | POLE3     | +     | UBL3      | +     | PAQR3     | +     |       |
| RHOBTB3   | +     | POLR1C    | +     | UGT1A10   | +     | PCNA      | +     |       |
| RLN1      | +     | PRIM2A    | +     | UGT2B28   | +     | PEG3      | +     |       |
| RLN2      | +     | PRKCI     | +     | UGT2B7    | +     | PIR       | +     |       |
| RNF6      | +     | PRMT3     | +     | VG5Q      | +     | PLA2G7    | +     |       |
| RPRIP1    | +     | PRSS7     | +     | VIM       | +     | POLE3     | +     |       |
| RPS8KA5   | +     | PVRL3     | +     | WSB2      | +     | PPAP2A    | +     |       |
| RRM1      | +     | PYGL      | +     | ZNF217    | +     | PPP1R3C   | +     |       |

|          | G245S | R248W   | R273H | P151S  | G245S | R248W    | R273H | P151S |
|----------|-------|---------|-------|--------|-------|----------|-------|-------|
| SC4MOL   | +     | RAD17   | +     | ZNF238 | +     | PRSS7    |       | +     |
| SEC31L1  | +     | RAD51C  | +     | ZNF273 | +     | PTGFR    |       | +     |
| SHOC2    | +     | RALBP1  | +     | ZNF294 | +     | PTPLB    |       | +     |
| SLAC2-B  | +     | RAPGEF2 | +     | ZNF415 | +     | PTTG1    |       | +     |
| SLC16A4  | +     | RBBP6   | +     | ZNF44  | +     | RAB27A   |       | +     |
| SLC25A16 | +     | RBBP8   | +     | ZWINT  | +     | RFC3     |       | +     |
| SLC26A2  | +     | RHOBTB3 | +     |        |       | RIFI     |       | +     |
| SLC31A1  | +     | RLN2    | +     |        |       | RPGRIP1  |       | +     |
| SLC4A7   | +     | RNF6    | +     |        |       | RPS6KA3  |       | +     |
| SMA4     | +     | RPGRIP1 | +     |        |       | RRM1     |       | +     |
| SNTB2    | +     | RPP14   | +     |        |       | RRM2     |       | +     |
| SOX9     | +     | RPP40   | +     |        |       | S100P    |       | +     |
| SOLE     | +     | RPS6KA3 | +     |        |       | SAT      |       | +     |
| SOSTM1   | +     | RPS6KA5 | +     |        |       | SCC      |       | +     |
| SRP72    | +     | RRM1    | +     |        |       | SEC31L1  |       | +     |
| SS18     | +     | SAT     | +     |        |       | SEPP1    |       | +     |
| SSA2     | +     | SC4MOL  | +     |        |       | SERPINE2 |       | +     |
| STAT3    | +     | SEC31L1 | +     |        |       | SF1      |       | +     |
| STATH    | +     | SFRS2   | +     |        |       | SH2D1A   |       | +     |
| STC2     | +     | SLAC2-B | +     |        |       | SLBP     |       | +     |
| STCH     | +     | SLC16A4 | +     |        |       | SLC16A6  |       | +     |
| TADA2L   | +     | SLC26A2 | +     |        |       | SLC26A2  |       | +     |
| TAF1A    | +     | SLC4A7  | +     |        |       | SLC4A7   |       | +     |
| TAX1BP1  | +     | SMA4    | +     |        |       | SLP1     |       | +     |
| TEB4     | +     | SMAD5   | +     |        |       | SMAD5    |       | +     |
| THRAP1   | +     | SMN1    | +     |        |       | SMC4L1   |       | +     |
| TM4SF3   | +     | SPAG5   | +     |        |       | SMG1     |       | +     |
| TMPO     | +     | SOSTM1  | +     |        |       | SMS      |       | +     |
| TUBB     | +     | SS18    | +     |        |       | SNAI2    |       | +     |
| TUSC3    | +     | SSA2    | +     |        |       | SNRPA1   |       | +     |
| TXNIP    | +     | ST18    | +     |        |       | SNTB2    |       | +     |
| TXNL4    | +     | STAT3   | +     |        |       | SORD     |       | +     |
| UBL3     | +     | STATH   | +     |        |       | SPAG5    |       | +     |
| UGT1A10  | +     | TAF1A   | +     |        |       | SPARCL1  |       | +     |
| UGT2B28  | +     | TAF4B   | +     |        |       | Spc25    |       | +     |
| UGT2B7   | +     | TAX1BP1 | +     |        |       | SSR1     |       | +     |
| VG5Q     | +     | TBPL1   | +     |        |       | SSX2     |       | +     |
| VIM      | +     | TEB4    | +     |        |       | SSX3     |       | +     |
| WDR21    | +     | TFDP2   | +     |        |       | SSX5     |       | +     |
| ZNF165   | +     | THRAP1  | +     |        |       | STK17B   |       | +     |
| ZNF217   | +     | TIPARP  | +     |        |       | STK39    |       | +     |
| ZNF238   | +     | TLE1    | +     |        |       | STRA13   |       | +     |
| ZNF273   | +     | TNPO1   | +     |        |       | TACG1    |       | +     |
| ZNF294   | +     | TOX     | +     |        |       | TAF1A    |       | +     |
| ZNF415   | +     | TRAP1   | +     |        |       | TCP1     |       | +     |
| ZNF44    | +     | TUBA1   | +     |        |       | TEB4     |       | +     |
| ZNF91    | +     | TUBA3   | +     |        |       | TM4SF1   |       | +     |
|          |       | TUBB    | +     |        |       | TNFAlP8  |       | +     |
|          |       | TUBB2   | +     |        |       | TNPO1    |       | +     |
|          |       | TUSC3   | +     |        |       | TPX2     |       | +     |
|          |       | TXNL4   | +     |        |       | TRGV9    |       | +     |
|          |       | USP14   | +     |        |       | TUBB2    |       | +     |
|          |       | VG5Q    | +     |        |       | TYMS     |       | +     |
|          |       | VIM     | +     |        |       | UAP1     |       | +     |
|          |       | WDR21   | +     |        |       | UBE2E1   |       | +     |
|          |       | WSB2    | +     |        |       | UGDH     |       | +     |
|          |       | YWHAZ   | +     |        |       | UGT1A10  |       | +     |
|          |       | ZNF217  | +     |        |       | UGT2B28  |       | +     |
|          |       | ZNF238  | +     |        |       | UGT2B4   |       | +     |
|          |       | ZNF273  | +     |        |       | UGT2B7   |       | +     |
|          |       | ZNF415  | +     |        |       | VPS13A   |       | +     |
|          |       | ZNF44   | +     |        |       | WDR21    |       | +     |
|          |       | ZNF85   | +     |        |       | WTAP     |       | +     |
|          |       |         | +     |        |       | ZNF44    |       | +     |
|          |       |         | +     |        |       | ZNF1     |       | +     |
|          |       |         | +     |        |       | ZWINT    |       | +     |

|           | R175H | R273H | R280K | R249S | R175H | R273H | R280K | R249S |
|-----------|-------|-------|-------|-------|-------|-------|-------|-------|
| ABLIM1    | +     | +     | +     | +     | -     | -     | -     | -     |
| AGR2      | +     | +     | +     | +     | -     | -     | -     | -     |
| AKAP12    | +     | +     | +     | +     | -     | -     | -     | -     |
| AKT2      | +     | +     | +     | +     | -     | -     | -     | -     |
| ALDH1A3   | +     | +     | +     | +     | -     | -     | -     | -     |
| ALDH3A1   | +     | +     | +     | +     | -     | -     | -     | -     |
| ANKRD5    | +     | +     | +     | +     | -     | -     | -     | -     |
| ANKRD9    | +     | +     | +     | +     | -     | -     | -     | -     |
| APS       | +     | +     | +     | +     | -     | -     | -     | -     |
| AQP3      | +     | +     | +     | +     | -     | -     | -     | -     |
| ARF4      | +     | +     | +     | +     | -     | -     | -     | -     |
| ARHGEF16  | +     | +     | +     | +     | -     | -     | -     | -     |
| ARHGFEF4  | +     | +     | +     | +     | -     | -     | -     | -     |
| ARID3B    | +     | +     | +     | +     | -     | -     | -     | -     |
| ATF3      | +     | +     | +     | +     | -     | -     | -     | -     |
| ATP9A     | +     | +     | +     | +     | -     | -     | -     | -     |
| BCO08967  | +     | +     | +     | +     | -     | -     | -     | -     |
| BCAN      | +     | +     | +     | +     | -     | -     | -     | -     |
| BCOR      | +     | +     | +     | +     | -     | -     | -     | -     |
| BIN3      | +     | +     | +     | +     | -     | -     | -     | -     |
| BMP2      | +     | +     | +     | +     | -     | -     | -     | -     |
| BMP6      | +     | +     | +     | +     | -     | -     | -     | -     |
| BRF1      | +     | +     | +     | +     | -     | -     | -     | -     |
| C10orf27  | +     | +     | +     | +     | -     | -     | -     | -     |
| C14orf116 | +     | +     | +     | +     | -     | -     | -     | -     |
| C14orf118 | +     | +     | +     | +     | -     | -     | -     | -     |
| C14orf128 | +     | +     | +     | +     | -     | -     | -     | -     |
| C14orf160 | +     | +     | +     | +     | -     | -     | -     | -     |
| C20orf111 | +     | +     | +     | +     | -     | -     | -     | -     |
| C21orf63  | +     | +     | +     | +     | -     | -     | -     | -     |
| C6orf4    | +     | +     | +     | +     | -     | -     | -     | -     |
| CA2       | +     | +     | +     | +     | -     | -     | -     | -     |
| CA9       | +     | +     | +     | +     | -     | -     | -     | -     |
| CAMP      | +     | +     | +     | +     | -     | -     | -     | -     |
| CAMTA2    | +     | +     | +     | +     | -     | -     | -     | -     |
| CD14      | +     | +     | +     | +     | -     | -     | -     | -     |
| CD24      | +     | +     | +     | +     | -     | -     | -     | -     |
| CDCC25A   | +     | +     | +     | +     | -     | -     | -     | -     |
| CDH1      | +     | +     | +     | +     | -     | -     | -     | -     |
| CHN2      | +     | +     | +     | +     | -     | -     | -     | -     |
| CKMT1     | +     | +     | +     | +     | -     | -     | -     | -     |
| CLCN5     | +     | +     | +     | +     | -     | -     | -     | -     |
| CLDN1     | +     | +     | +     | +     | -     | -     | -     | -     |
| CLMN      | +     | +     | +     | +     | -     | -     | -     | -     |
| CPT1A     | +     | +     | +     | +     | -     | -     | -     | -     |
| CPVL      | +     | +     | +     | +     | -     | -     | -     | -     |
| CRF       | +     | +     | +     | +     | -     | -     | -     | -     |
| CTSD      | +     | +     | +     | +     | -     | -     | -     | -     |
| CYP1A1    | +     | +     | +     | +     | -     | -     | -     | -     |
| DDR1      | +     | +     | +     | +     | -     | -     | -     | -     |
| DHRS9     | +     | +     | +     | +     | -     | -     | -     | -     |
| DMD       | +     | +     | +     | +     | -     | -     | -     | -     |
| E2F5      | +     | +     | +     | +     | -     | -     | -     | -     |
| EDL3      | +     | +     | +     | +     | -     | -     | -     | -     |
| EEF1A2    | +     | +     | +     | +     | -     | -     | -     | -     |
| EMES      | +     | +     | +     | +     | -     | -     | -     | -     |
| ERBB2IP   | +     | +     | +     | +     | -     | -     | -     | -     |
| ERBB3     | +     | +     | +     | +     | -     | -     | -     | -     |
| EVER1     | +     | +     | +     | +     | -     | -     | -     | -     |
| FGFR2     | +     | +     | +     | +     | -     | -     | -     | -     |
| FLJ11017  | +     | +     | +     | +     | -     | -     | -     | -     |
| FLJ13725  | +     | +     | +     | +     | -     | -     | -     | -     |
| FLJ20433  | +     | +     | +     | +     | -     | -     | -     | -     |
| FLJ22056  | +     | +     | +     | +     | -     | -     | -     | -     |
| FLJ31295  | +     | +     | +     | +     | -     | -     | -     | -     |
| FLJ44952  | +     | +     | +     | +     | -     | -     | -     | -     |
| FLJ90805  | +     | +     | +     | +     | -     | -     | -     | -     |
| FLRT3     | +     | +     | +     | +     | -     | -     | -     | -     |
| FOS       | +     | +     | +     | +     | -     | -     | -     | -     |
| FOXA1     | +     | +     | +     | +     | -     | -     | -     | -     |
| FOXG1B    | +     | +     | +     | +     | -     | -     | -     | -     |
| FST       | +     | +     | +     | +     | -     | -     | -     | -     |
| FZD3      | +     | +     | +     | +     | -     | -     | -     | -     |
| GLDC      | +     | +     | +     | +     | -     | -     | -     | -     |
| GPR153    | +     | +     | +     | +     | -     | -     | -     | -     |
| GPR27     | +     | +     | +     | +     | -     | -     | -     | -     |
| GPR54     | +     | +     | +     | +     | -     | -     | -     | -     |
| GPR7      | +     | +     | +     | +     | -     | -     | -     | -     |
| H1FO      | +     | +     | +     | +     | -     | -     | -     | -     |

|           | R175H | R273H | R280K | R249S | R175H | R273H | R280K | R249S |
|-----------|-------|-------|-------|-------|-------|-------|-------|-------|
| HAS3      | +     | +     | +     | +     | -     | -     | -     | -     |
| HA2       | +     | +     | +     | +     | -     | -     | -     | -     |
| HHEX      | +     | +     | +     | +     | -     | -     | -     | -     |
| HLXB9     | +     | +     | +     | +     | -     | -     | -     | -     |
| HMG1      | +     | +     | +     | +     | -     | -     | -     | -     |
| HOMER2    | +     | +     | +     | +     | -     | -     | -     | -     |
| HR        | +     | +     | +     | +     | -     | -     | -     | -     |
| HRH4      | +     | +     | +     | +     | -     | -     | -     | -     |
| ID3       | +     | +     | +     | +     | -     | -     | -     | -     |
| IFI30     | +     | +     | +     | +     | -     | -     | -     | -     |
| IL1F7     | +     | +     | +     | +     | -     | -     | -     | -     |
| IL1RL1    | +     | +     | +     | +     | -     | -     | -     | -     |
| INHA      | +     | +     | +     | +     | -     | -     | -     | -     |
| INPPL1    | +     | +     | +     | +     | -     | -     | -     | -     |
| INSR      | +     | +     | +     | +     | -     | -     | -     | -     |
| IRF5      | +     | +     | +     | +     | -     | -     | -     | -     |
| ITGB4     | +     | +     | +     | +     | -     | -     | -     | -     |
| ITPR3     | +     | +     | +     | +     | -     | -     | -     | -     |
| JAG2      | +     | +     | +     | +     | -     | -     | -     | -     |
| JMD2B     | +     | +     | +     | +     | -     | -     | -     | -     |
| JUP       | +     | +     | +     | +     | -     | -     | -     | -     |
| KCNJ2     | +     | +     | +     | +     | -     | -     | -     | -     |
| KIAA0220  | +     | +     | +     | +     | -     | -     | -     | -     |
| KIAA0515  | +     | +     | +     | +     | -     | -     | -     | -     |
| KIAA0599  | +     | +     | +     | +     | -     | -     | -     | -     |
| KIAA0759  | +     | +     | +     | +     | -     | -     | -     | -     |
| KIAA0947  | +     | +     | +     | +     | -     | -     | -     | -     |
| KIAA1622  | +     | +     | +     | +     | -     | -     | -     | -     |
| KIAA1944  | +     | +     | +     | +     | -     | -     | -     | -     |
| KL1F6     | +     | +     | +     | +     | -     | -     | -     | -     |
| KLHL13    | +     | +     | +     | +     | -     | -     | -     | -     |
| KRT15     | +     | +     | +     | +     | -     | -     | -     | -     |
| KRT16     | +     | +     | +     | +     | -     | -     | -     | -     |
| KRT6B     | +     | +     | +     | +     | -     | -     | -     | -     |
| KRTHB1    | +     | +     | +     | +     | -     | -     | -     | -     |
| KYNU      | +     | +     | +     | +     | -     | -     | -     | -     |
| LAD1      | +     | +     | +     | +     | -     | -     | -     | -     |
| LAMA3     | +     | +     | +     | +     | -     | -     | -     | -     |
| LHX1      | +     | +     | +     | +     | -     | -     | -     | -     |
| LISCH7    | +     | +     | +     | +     | -     | -     | -     | -     |
| LLGL2     | +     | +     | +     | +     | -     | -     | -     | -     |
| LOC126353 | +     | +     | +     | +     | -     | -     | -     | -     |
| LOC146206 | +     | +     | +     | +     | -     | -     | -     | -     |
| LOC255022 | +     | +     | +     | +     | -     | -     | -     | -     |
| LOC58489  | +     | +     | +     | +     | -     | -     | -     | -     |
| LRRK1     | +     | +     | +     | +     | -     | -     | -     | -     |
| LU        | +     | +     | +     | +     | -     | -     | -     | -     |
| LYN       | +     | +     | +     | +     | -     | -     | -     | -     |
| LZTS1     | +     | +     | +     | +     | -     | -     | -     | -     |
| MAL2      | +     | +     | +     | +     | -     | -     | -     | -     |
| MAP2K5    | +     | +     | +     | +     | -     | -     | -     | -     |
| MAP7      | +     | +     | +     | +     | -     | -     | -     | -     |
| MAZ       | +     | +     | +     | +     | -     | -     | -     | -     |
| MBP       | +     | +     | +     | +     | -     | -     | -     | -     |
| MEF2D     | +     | +     | +     | +     | -     | -     | -     | -     |
| MGC16207  | +     | +     | +     | +     | -     | -     | -     | -     |
| MGC5356   | +     | +     | +     | +     | -     | -     | -     | -     |
| MIRAB13   | +     | +     | +     | +     | -     | -     | -     | -     |
| MMP28     | +     | +     | +     | +     | -     | -     | -     | -     |
| MTA1      | +     | +     | +     | +     | -     | -     | -     | -     |
| MYO5B     | +     | +     | +     | +     | -     | -     | -     | -     |
| NETO1     | +     | +     | +     | +     | -     | -     | -     | -     |
| NFKBIA    | +     | +     | +     | +     | -     | -     | -     | -     |
| NMT2      | +     | +     | +     | +     | -     | -     | -     | -     |
| OFD1      | +     | +     | +     | +     | -     | -     | -     | -     |
| OGFR      | +     | +     | +     | +     | -     | -     | -     | -     |
| ORAOV2    | +     | +     | +     | +     | -     | -     | -     | -     |
| P2RX5     | +     | +     | +     | +     | -     | -     | -     | -     |
| P2RY2     | +     | +     | +     | +     | -     | -     | -     | -     |
| PARD6B    | +     | +     | +     | +     | -     | -     | -     | -     |
| PAWR      | +     | +     | +     | +     | -     | -     | -     | -     |
| PCBP2     | +     | +     | +     | +     | -     | -     | -     | -     |
| PDE2A     | +     | +     | +     | +     | -     | -     | -     | -     |
| PDE3B     | +     | +     | +     | +     | -     | -     | -     | -     |
| PDK4      | +     | +     | +     | +     | -     | -     | -     | -     |
| PIS       | +     | +     | +     | +     | -     | -     | -     | -     |
| PKIB      | +     | +     | +     | +     | -     | -     | -     | -     |
| PLAU      | +     | +     | +     | +     | -     | -     | -     | -     |
| PLEKHH1   | +     | +     | +     | +     | -     | -     | -     | -     |
| PPL       | +     | +     | +     | +     | -     | -     | -     | -     |
| PPP1R3E   | +     | +     | +     | +     | -     | -     | -     | -     |





| R175H | R273H      | R280K | R249S     | R175H | R273H     | R280K | R249S     |
|-------|------------|-------|-----------|-------|-----------|-------|-----------|
|       | SEMA4D     | +     | SESN1     | -     | SLC9A3R1  | -     | SLC2A9    |
|       | SERPINB2   | +     | SLC2A13   | -     | SLC02B1   | -     | SLC30A1   |
|       | SERPINB3   | +     | SLC2A8    | -     | SOM       | -     | SLC35D1   |
|       | SFRS1      | +     | SLC2A9    | -     | SORBS1    | -     | SLC35E4   |
|       | SH3BGR2    | +     | SLC35D1   | -     | SORL1     | -     | SLC4A11   |
|       | SH3BGR2    | +     | SLC35E4   | -     | SPAG1     | -     | SLC9A1    |
|       | SIAH1      | +     | SLC4A11   | -     | SPN       | -     | SLC9A3R1  |
|       | SIAT7D     | +     | SLC9A1    | -     | SPRL2A    | -     | SLC02B1   |
|       | SIPA1      | +     | SLC9A3R1  | -     | SSB1      | -     | SOM       |
|       | SIRPB1     | +     | SLC02B1   | -     | STAR      | -     | SORBS1    |
|       | SIRT6      | +     | SORBS1    | -     | STAR5     | -     | SORL1     |
|       | SLA/LP     | +     | SORL1     | -     | STAT4     | -     | SPAG1     |
|       | SLC16A4    | +     | SPAG1     | -     | SULF2     | -     | SPN       |
|       | SLC23A1    | +     | SPN       | -     | SYK       | -     | SPRL2A    |
|       | SLC27A3    | +     | SPRL2A    | -     | SYNCOILIN | -     | SSB1      |
|       | SLC29A2    | +     | SSB1      | -     | SYTL2     | -     | STAR      |
|       | SLC39A14   | +     | STAR      | -     | TACC1     | -     | STAR5     |
|       | SLC6A8     | +     | STAR5     | -     | TAF3      | -     | STAT4     |
|       | SLC04A1    | +     | STAT4     | -     | TAGLN     | -     | STAT4     |
|       | SLPI       | +     | SYNCOILIN | -     | TAP1      | -     | SULF2     |
|       | SNTA1      | +     | SYTL2     | -     | TBXA2R    | -     | SYK       |
|       | SNX27      | +     | TACC1     | -     | TEAD3     | -     | SYNCOILIN |
|       | SOD2       | +     | TAF3      | -     | TGFBR1    | -     | SYTL2     |
|       | SORD       | +     | TAGLN     | -     | TINP1     | -     | TACC1     |
|       | SPATA2     | +     | TAP1      | -     | TLR3      | -     | TAF3      |
|       | SPINT2     | +     | TBXA2R    | -     | TM7SF1    | -     | TAGLN     |
|       | SPRC4P     | +     | TEAD3     | -     | TM7SF3    | -     | TAP1      |
|       | SRGAP1     | +     | TGFBR1    | -     | TMEM16D   | -     | TBXA2R    |
|       | SSH1       | +     | TINP1     | -     | TMG4      | -     | TEAD3     |
|       | ST6GALNAC6 | +     | TLR3      | -     | TNFRSF10B | -     | TGFBR1    |
|       | STAM2      | +     | TM7SF1    | -     | TNFRSF14  | -     | TINP1     |
|       | STAP2      | +     | TM7SF3    | -     | TP53AP1   | -     | TLR3      |
|       | STARD10    | +     | TMEM16D   | -     | TP53I1    | -     | TM7SF1    |
|       | STAU2      | +     | TMG4      | -     | TP53I3    | -     | TM7SF3    |
|       | STK38L     | +     | TNFRSF10B | -     | TP53INP1  | -     | TMEM16D   |
|       | STRBP      | +     | TNFRSF14  | -     | TP73      | -     | TMEM16D   |
|       | STRN4      | +     | TP53      | -     | TRAF4     | -     | TNFRSF10B |
|       | STS        | +     | TP53AP1   | -     | TREM2     | -     | TNFRSF14  |
|       | SUFU       | +     | TP53I1    | -     | TRIM11    | -     | TP53AP1   |
|       | SYNGR2     | +     | TP53I3    | -     | TRIM2     | -     | TP53I1    |
|       | TBP        | +     | TP53INP1  | -     | TRIM3     | -     | TP53I3    |
|       | TACSTD2    | +     | TP73      | -     | TRIM8     | -     | TP53INP1  |
|       | TCEA2      | +     | TRAF4     | -     | TSGA10    | -     | TP73      |
|       | TFAP2A     | +     | TREM2     | -     | ULBP2     | -     | TRAF4     |
|       | TFAP2C     | +     | TRIM11    | -     | VSNL1     | -     | TREM2     |
|       | THBD       | +     | TRIM2     | -     | WDR8      | -     | TRIM11    |
|       | TIMP2      | +     | TRIM22    | -     | WFDC5     | -     | TRIM2     |
|       | TLN1       | +     | TRIM3     | -     | WIG1      | -     | TRIM2     |
|       | TM4SF1     | +     | TRIM8     | -     | WWP1      | -     | TRIM3     |
|       | TM7SF2     | +     | TSGA10    | -     | XLalphas  | -     | TRIM8     |
|       | TM9SF4     | +     | ULBP2     | -     | ZNF197    | -     | TSGA10    |
|       | TNFRSF10A  | +     | VSNL1     | -     | ZNF236    | -     | ULBP2     |
|       | TNP02      | +     | WDR8      | -     | ZNF385    | -     | VSNL1     |
|       | TOP1MT     | +     | WFDC5     | -     | ZNF441    | -     | WDR8      |
|       | TPD52      | +     | WIG1      | -     | ZNF492    | -     | WFDC5     |
|       | TPD52      | +     | WWP1      | -     |           | -     | WIG1      |
|       | TREM1      | +     | XLalphas  | -     |           | -     | WWP1      |
|       | TRIM29     | +     | ZNF197    | -     |           | -     | XLalphas  |
|       | TRIM36     | +     | ZNF236    | -     |           | -     | ZNF197    |
|       | TSRC1      | +     | ZNF385    | -     |           | -     | ZNF236    |
|       | TTG7       | +     | ZNF492    | -     |           | -     | ZNF385    |
|       | TXNDC5     | +     |           | -     |           | -     | ZNF441    |
|       | TXNIP      | +     |           | -     |           | -     | ZNF492    |
|       | TYRO3      | +     |           | -     |           | -     |           |
|       | UBCE1/TP5  | +     |           | -     |           | -     |           |
|       | UBE2D3     | +     |           | -     |           | -     |           |
|       | UCN        | +     |           | -     |           | -     |           |
|       | UNC93B1    | +     |           | -     |           | -     |           |
|       | UTS2       | +     |           | -     |           | -     |           |
|       | WDR5B      | +     |           | -     |           | -     |           |
|       | ZFP36      | +     |           | -     |           | -     |           |
|       | ZFP67      | +     |           | -     |           | -     |           |
|       | ZNF499     | +     |           | -     |           | -     |           |
|       | ZNF545     | +     |           | -     |           | -     |           |
|       | ZNF580     | +     |           | -     |           | -     |           |



| scian CANCER RES 2004 (a) |       |       |       |   |
|---------------------------|-------|-------|-------|---|
|                           | R175H | R273H | D281G |   |
| GARS                      | 5.248 | 5.248 | 5.248 | + |
| TARS                      | 3.691 | 3.691 | 3.691 | + |
| YARS                      | 2.713 | 2.713 | 2.713 | + |
| NARS                      | 2.880 | 2.880 | 2.880 | + |
| ASNS                      | 5.071 | 5.071 | 5.071 | + |
| IMPDH2                    | 3.036 | 3.036 | 3.036 | + |
| LOC115871                 | 3.048 | 3.048 | 3.048 | + |
| CCNH                      | 2.035 | 2.035 | 2.035 | + |
| CCNB2                     | 3.327 | 3.327 | 3.327 | + |
| CDC25A                    | 2.478 | 2.478 | 2.478 | + |
| STAMBP                    | 2.199 | 2.199 | 2.199 | + |
| MYC                       | 2.749 | 2.749 | 2.749 | + |
| MCL1                      | 3.607 | 3.607 | 3.607 | + |
| LOC120450                 | 2.057 | 2.057 | 2.057 | + |
| RHOG                      | 1.045 | 1.045 | 1.045 | + |
| HAX1                      | 3.352 | 3.352 | 3.352 | + |
| EBAG9                     | 1.798 | 1.798 | 1.798 | + |
| ANGPT1                    | 2.719 | 2.719 | 2.719 | + |
| ITGA6                     | 3.917 | 3.917 | 3.917 | + |
| POLD2                     | 2.783 | 2.783 | 2.783 | + |
| NFKB2                     | 2.664 | 2.664 | 2.664 | + |
| LOC139376                 | 3.922 | 3.922 | 3.922 | + |
| ATIC                      | 3.260 | 3.260 | 3.260 | + |
| POLR2E                    | 3.171 | 3.171 | 3.171 | + |
| CEBPB                     | 4.684 | 4.684 | 4.684 | + |

| scian, MOL. CELL. BIO 2005 |       |       |       |   |
|----------------------------|-------|-------|-------|---|
|                            | R175H | R273H | D281G |   |
| QARS                       | 1.677 | 1.677 | 1.677 | + |
| SRM                        | 1.766 | 1.766 | 1.766 | + |
| PARP1                      | 1.277 | 1.277 | 1.277 | + |
| XRCC5                      | 1.081 | 1.081 | 1.081 | + |
| MCM6                       | 1.960 | 1.960 | 1.960 | + |
| CCNB2                      | 2.790 | 2.790 | 2.790 | + |
| CD44                       | 1.841 | 1.841 | 1.841 | + |
| DRG1                       | 1.877 | 1.877 | 1.877 | + |
| CDC25A                     | 1.838 | 1.838 | 1.838 | + |
| FYN                        | 1.240 | 1.240 | 1.240 | + |
| EBAG9                      | 1.435 | 1.435 | 1.435 | + |
| MYBL2                      | 1.304 | 1.304 | 1.304 | + |
| ITGA6                      | 2.747 | 2.747 | 2.747 | + |
| POLA2                      | 1.971 | 1.971 | 1.971 | + |
| MCM6                       | 1.960 | 1.960 | 1.960 | + |
| MCM3                       | 1.315 | 1.315 | 1.315 | + |
| NAP1L1                     | 1.205 | 1.205 | 1.205 | + |
| MAPKAPK3                   | 1.692 | 1.692 | 1.692 | + |
| MAPKAPK2                   | 1.312 | 1.312 | 1.312 | + |
| NFKB2                      | 1.964 | 1.964 | 1.964 | + |
| EBAG9                      | 1.435 | 1.435 | 1.435 | + |
| ATIC                       | 1.262 | 1.262 | 1.262 | + |
| POLR2E                     | 2.012 | 2.012 | 2.012 | + |

| mizuarai et al CANCER res, 2006 |       |       |       |
|---------------------------------|-------|-------|-------|
|                                 | V157F | R175H | R248Q |
| CYORF48                         | +     | +     | +     |
| CCNB1IP1                        | +     | +     | +     |
| MRPL46                          | +     | +     | +     |
| ZNF24                           | +     | +     | +     |
| CARS                            | +     | +     | +     |
| MOCOS                           | +     | +     | +     |
| TNFRSF9                         | +     | +     | +     |
| CARS                            | +     | +     | +     |
| LOC56901                        | +     | +     | +     |
| GEF-H1                          | +     | +     | +     |
| SFPQ                            | +     | +     | +     |
| CCNL1                           | +     | +     | +     |

| li et al cancer res 2004 |           |           |   |
|--------------------------|-----------|-----------|---|
|                          | M237I (+) | M237I (-) |   |
| HMGCR                    | +         | CCR7      | - |
| ID1                      | +         | PMAIP1    | - |
| FDFT1                    | +         | PPM1D     | - |
|                          |           | SES2      | - |
|                          |           | CDKN1A    | - |
|                          |           | NIFU      | - |
|                          |           | PRGI      | - |
|                          |           | PSA       | - |
|                          |           | CTBS      | - |
|                          |           | CTH       | - |
|                          |           | TNFRSF6   | - |
|                          |           | FLJ10374  | - |
|                          |           | MDM2      | - |
|                          |           | PIG3      | - |

| bossi et al. Cell cycle 2008 |                |       |   |
|------------------------------|----------------|-------|---|
| GENE                         | Accession N    | R175H |   |
| ARHGDI4                      | A1571798       | 7.09* | + |
| PLEC1                        | Z54897         | 7.04  | + |
| MARCKS                       | D10522.1       | 5.00  | + |
| ZFP36L2                      | A1356398       | 4.08  | + |
| HMGAI1                       | AF176039.1     | 4.08  | + |
| PXN                          | D86862.1       | 4.05* | + |
| HELLS                        | NM0180634.04.1 | 4.04  | + |
| YPT3                         | X79780         | 4.00  | + |
| ILF3                         | AF167569.1     | 3.09  | + |
| MAZ                          | D85131.1       | 3.08  | + |
| SRPR                         | NM003139.1     | 3.08  | + |
| TRP                          | BF110993       | 3.04  | + |
| SLC19A1                      | U15939.1       | 3.04  | + |
| CYSLT2R                      | NM020377.1     | 3.02  | + |
| ANTXR1                       | NM016153.1     | 2.09  | + |
| BCL2L1                       | NM001191.1     | 2.08* | + |
| NFKB2                        | NM002502.1     | 2.08  | + |
| ID2                          | NM002166       | 2.08  | + |
| EIF4G1                       | BE966876       | 2.07  | + |
| CDC25A                       | A1343459       | 2.06  | + |
| DAPK3                        | BF686824       | 2.05  | + |
| IGF1R                        | NM000875.2     | 2.03* | + |
| EIF5A                        | NM001970.1     | 1.08  | + |
| RANGAP1                      | NM002883.1     | 1.08* | + |
| TCF4                         | NM_003199.1    | 1.07  | + |
| DHCR24                       | NM014762.1     | 1.07* | + |
| TFFI2                        | L27624.1       | 1.06  | + |
| RAB6K1FL                     | NM005733.1     | 1.04* | + |
| EIF1A                        | NM_001412.1    | 1.03  | + |
| MAP2K3                       | L36719.1       | 1.00* | + |

| o'farrell CANCER RES 2004 (COMPAR) |       |   |
|------------------------------------|-------|---|
|                                    | A138P |   |
| HBB                                | 2.21  | + |
| RLN1                               | 2.12  | + |
| CCDC28D                            | 0.34  | - |
| ZNF22                              | 0.5   | - |

| scian et al Oncogene 2004(a) |       |   |
|------------------------------|-------|---|
| GENE                         | D281G |   |
| TERT                         | 5.4   | + |
| ERCC1                        | 5.4   | + |
| MLH1                         | 6.8   | + |
| PLAUR                        | 6.5   | + |
| PTGER1                       | 3.8   | + |
| NR2C1                        | 3.5   | + |
| ERBB2                        | 3.4   | + |
| ASNS                         | 4.0   | + |
| E2F5                         | 2.6   | + |
| IGF2                         | 12.5  | + |
| PLAUR                        | 6.5   | + |
| ERBB2                        | 3.4   | + |
| PCCA                         | 3.5   | + |
| DGCR6                        | 6.5   | + |
| IGF2                         | 12.5  | + |
| LRRCC1                       | 2.6   | + |
| NF-IL6                       | 4.4   | + |
| TDFP1                        | 3.8   | + |
| TGFA                         | 3.2   | + |
| IGF2                         | 12.5  | + |
| MTMR11                       | 3.2   | + |
| ERCC1                        | 5.4   | + |
| JunB                         | 4.5   | + |
| NPHP4                        | 7.8   | + |
| ATG4B                        | 7.6   | + |
| SEPT10                       | 3.1   | + |
| CTH                          | 4.6   | + |
| PLEKH82                      | 2.4   | + |
| RASSF2                       | 2.8   | + |

| weisz et al cancer res 2004 |           |
|-----------------------------|-----------|
|                             | R175H (-) |
| OXCT                        | 13        |
| ANX3                        | 3.5       |
| ITGA5                       | 4.5       |
| IL13RA1                     | 14        |
| PPARG                       | 7.5       |
| GALC                        | 8.4       |
| GSK3A                       | 2.5       |
| MYBL1                       | 2.5       |
| PSMB8                       | 2.6       |
| SMARCA2                     | 3.6       |
| TGFB1                       | 2.6       |
| PLAUR                       | 3.4       |
| MEST                        | 3.7       |
| IGFBP6                      | 9         |
