# Supplementary material for: More targets, more pathways and more clues for mutant p53
Source: PubMed Central journal article supplement — Oncogenesis. 2013 Jul 1;2(7):e54–. doi: 10.1038/oncsis.2013.15 (PMC3740285; doi:10.1038/oncsis.2013.15), 2013-07-01
Supplement: oncsis201315x2.pdf [file oncsis201315x2.pdf]

|                |            | MOTIVO_P53_HH        | MOTIVO_P53_HH_s     | MOTIVO_P53_HT        | MOTIVO_P53_HT_s   | MOTIVO_P53_TT         | MOTIVO_P53_repression |
|----------------|------------|----------------------|---------------------|----------------------|-------------------|-----------------------|-----------------------|
|                | bp         | RRRCWWGYYY_RRCWWGYYY | RRCWWGY_Y_RRCWWGYYY | RRRCWRRRCW_RRCWRRRCW | RCWRRRCW_RCWRRRCW | WGYYYRRRCW_WGYYYRRRCW | RRNCNNGNYN_NRNCNNGNY  |
| geni up        | 518000     | 1                    | 13                  | 22                   | 132               | 8                     | 2092                  |
| geni down      | 806000     | 12                   | 70                  | 109                  | 407               | 21                    | 6902                  |
| UP 1:X         |            | 518000               | 39846.15385         | 23545.45455          | 3924.242424       | 64750                 | 247.6099426           |
| Down 1:X       |            | 67166.66667          | 11514.28571         | 7394.495413          | 1980.34398        | 38380.95238           | 116.7777456           |
| P(OBS-up)      |            | 1.9305E-06           | 2.50965E-05         | 4.2471E-05           | 0.000254826       | 1.5444E-05            | 0.00403861            |
| P(OBS-down)    |            | 1.48883E-05          | 8.68486E-05         | 0.000135236          | 0.000504963       | 2.60546E-05           | 0.008563275           |
| P(EXP)         |            | 4.71829E-06          | 4.03208E-05         | 5.22889E-05          | 0.000246322       | 1.23712E-05           | 0.00196954            |
| MEDIA (UP)     |            | 2.44                 | 20.89               | 27.09                | 127.60            | 6.41                  | 1020.22               |
| DS (UP)        |            | 1.56                 | 4.57                | 5.20                 | 11.29             | 2.53                  | 31.91                 |
| MEDIA (DOWN)   |            | 3.80                 | 32.50               | 42.14                | 198.54            | 9.97                  | 1587.45               |
| DS (DOWN)      |            | 1.95                 | 5.70                | 6.49                 | 14.09             | 3.16                  | 39.80                 |
| P_VALUE (UP)   |            | 0.18                 | 0.04                | 0.84                 | 0.65              | 0.26                  | 0.0000                |
| P_VALUE (DOWN) |            | 1.3E-05              | 2.4E-11             | 0.00E+00             | 0.0E+00           | 2.4E-04               | 0.0E+00               |
| CHR            |            |                      |                     |                      |                   |                       |                       |
| 1              | 226828929  | 1071                 | 9251                | 12416                | 57237             | 3081                  | 486939                |
| 2              | 238349289  | 1114                 | 9982                | 12063                | 58163             | 2778                  | 428305                |
| 3              | 195073306  | 890                  | 8265                | 9246                 | 46159             | 2202                  | 329882                |
| 4              | 187239983  | 780                  | 7384                | 8315                 | 41273             | 1955                  | 267392                |
| 5              | 177696509  | 862                  | 7271                | 8104                 | 41079             | 2029                  | 290452                |
| 6              | 169212327  | 763                  | 6709                | 7973                 | 39226             | 1745                  | 277676                |
| 7              | 157953789  | 751                  | 6038                | 7918                 | 38040             | 1943                  | 310197                |
| 8              | 143297300  | 680                  | 5755                | 7144                 | 34407             | 1720                  | 248988                |
| 9              | 117790386  | 565                  | 4761                | 6337                 | 30293             | 1476                  | 249533                |
| 10             | 132016990  | 721                  | 5326                | 7103                 | 34217             | 1672                  | 273284                |
| 11             | 130908954  | 642                  | 5469                | 6930                 | 33631             | 1623                  | 267401                |
| 12             | 129826379  | 558                  | 5085                | 6615                 | 30795             | 1755                  | 257411                |
| 13             | 95749578   | 451                  | 3843                | 4103                 | 21219             | 869                   | 141967                |
| 14             | 87191216   | 407                  | 3567                | 5532                 | 22505             | 1093                  | 175884                |
| 15             | 81992482   | 365                  | 3296                | 4511                 | 21279             | 1138                  | 184520                |
| 16             | 79932432   | 388                  | 3235                | 5033                 | 21842             | 1245                  | 229180                |
| 17             | 79376966   | 336                  | 3015                | 5240                 | 21874             | 1408                  | 247101                |
| 18             | 74658403   | 319                  | 2923                | 3537                 | 17582             | 808                   | 124607                |
| 19             | 55878340   | 241                  | 1641                | 4238                 | 15965             | 1095                  | 225583                |
| 20             | 59424990   | 442                  | 2676                | 3722                 | 16877             | 863                   | 153582                |
| 21             | 33924367   | 199                  | 1506                | 1770                 | 8405              | 395                   | 68979                 |
| 22             | 34352072   | 149                  | 1413                | 2552                 | 11322             | 650                   | 127718                |
| X              | 152118949  | 692                  | 6181                | 8009                 | 36038             | 1636                  | 235883                |
| Y              | 24649555   | 134                  | 945                 | 1420                 | 6395              | 270                   | 41143                 |
| TOTAL          | 2865443491 | 13520                | 115537              | 149831               | 705823            | 35449                 | 5643607               |
| P(EXP)         |            | 4.71829E-06          | 4.03208E-05         | 5.22889E-05          | 2.46E-04          | 1.23712E-05           | 1.97E-03              |
